# Supplementary material for: Tuning the self-assembly of lanthanide triple stranded heterobimetallic helicates by ligand design
Source: Royal Society of Chemistry journal article supplement (doi:10.1039/b715672c), 2007-12-10
Supplement: b715672c.pdf [file b715672c.pdf]

Electronic Supplementary Information for Dalton Transactions  
This journal is © The Royal Society of Chemistry 2007

## **Tuning the Self-assembly of Lanthanide Triple Stranded Heterobimetallic Helicates by Ligand Design**

Thomas B. Jensen, Rosario Scopelliti, and Jean-Claude G. Bünzli\*

*Contribution from the Laboratory of Lanthanide Supramolecular Chemistry, École  
Polytechnique Fédérale de Lausanne, BCH 1402, CH-1015 Lausanne (Switzerland)*

**Electronic Supplementary Information**

(11 pages)

**Table S1**  $^1\text{H}$  NMR of  $\text{L}^{\text{AB4}}$  in  $\text{CDCl}_3$ .

|                | 1 or 3      | 2    | 23       | 8 and 10 | 3 or 1   | 15 and 17 | 20        | 6, 12, 21, 22 | 7 and 11 |             |          |          |
|----------------|-------------|------|----------|----------|----------|-----------|-----------|---------------|----------|-------------|----------|----------|
| $\delta$ / ppm | 8.38        | 7.93 | 7.86     | 7.73     | 7.71     | 7.54      | 7.46      | 7.45          | 7.45     | 7.28 – 7.38 | 7.25     | 7.22     |
|                | dd 1H       | t 1H | dd 1H    | s 1H     | s 1H     | dd 1H     | d 1H      | d 1H          | dd 1H    | m 4H        | dd 1H    | dd 1H    |
| $J$ / Hz       | 8.1; 1.2    | 7.9  | 6.8; 2.2 |          |          | 7.8; 1.1  | 2.4       | 2.4           | 6.5; 1.3 |             | 8.3; 1.8 | 8.3; 1.8 |
|                | 4, 13, 18   | 9    | 24 or 26 | 28       | 26 or 24 | 5         | 14 and 19 | 25 or 27      | 29       | 27 or 25    |          |          |
| $\delta$ / ppm | 4.68 – 4.79 | 4.30 | 3.61     | 3.54     | 3.36     | 1.45      | 1.34      | 1.32          | 1.29     | 1.26        | 1.08     |          |
|                | m 6H        | s 2H | q 2H     | q 4H     | q 2H     | t 3H      | t 3H      | t 3H          | t 3H     | t 6H        | t 3H     |          |
| $J$ / Hz       |             |      | 7.1      | 7.1      | 7.1      | 7.2       | 7.1       | 7.1           | 7.0      | 7.2         | 7.1      |          |

**Table S2**  $^1\text{H}$  NMR of  $\text{L}^{\text{AB5}}$  in  $\text{CDCl}_3$ .

|                | 15 and 17 | 1 or 3 | 2        | 23   | 8 and 10 | 3 or 1    | 20   | 6, 12, 21, 22 | 7 or 11  |             |          |      |
|----------------|-----------|--------|----------|------|----------|-----------|------|---------------|----------|-------------|----------|------|
| $\delta$ / ppm | 8.39      | 8.38   | 8.38     | 7.93 | 7.87     | 7.74      | 7.70 | 7.54          | 7.49     | 7.33 – 7.41 | 7.27     |      |
|                | d 1H      | d 1H   | dd 1H    | t 1H | dd 1H    | d 1H      | d 1H | dd 1H         | dd 1H    | m 4H        | dd 1H    |      |
| $J$ / Hz       | 1.9       | 1.9    | 8.2; 1.1 | 7.9  | 7.3; 2.0 | 1.3       | 1.3  | 7.7; 1.1      | 7.4; 1.8 |             | 8.6; 1.5 |      |
|                | 11 or 7   | 18     | 13       | 4    | 9        | 24 and 26 | 5    | 19            | 14       | 25 and 27   |          |      |
| $\delta$ / ppm | 7.25      | 4.81   | 4.77     | 4.75 | 4.31     | 3.61      | 3.36 | 1.45          | 1.38     | 1.29        | 1.29     | 1.08 |
|                | dd 1H     | q 2H   | q 2H     | q 2H | s 2H     | q 2H      | q 2H | t 3H          | t 3H     | t 3H        | t 3H     | t 3H |
| $J$ / Hz       | 8.0; 1.5  | 7.2    | 7.2      | 7.1  |          | 7.1       | 7.1  | 7.1           | 7.2      | 7.2         | 7.1      | 7.1  |

**Table S3** Definition of least squares planes.

|                   | $\text{L}^1$                    | $\text{L}^2$                      | $\text{L}^3$                          |
|-------------------|---------------------------------|-----------------------------------|---------------------------------------|
| <i>bpb moiety</i> |                                 |                                   |                                       |
| terminal          | 1: C1-7;                        | 2: C48-54;                        | 3: C95-101;                           |
| benzimidazole     | N1-2                            | N11-12                            | N21-22                                |
| imidazole only    | 1 <i>i</i> : C1,6-7;<br>N1-2    | 2 <i>i</i> : C48,53-54;<br>N11-12 | 3 <i>i</i> : C95,100-<br>101; N21-22  |
| pyridine          | 4: C8-12;<br>N3                 | 5: C55-59;<br>N13                 | 6: C102-106;<br>N23                   |
| bridging          | 7: C13-19;                      | 8: C60-66;                        | 9: C107-113;                          |
| benzimidazole     | N4-5                            | N14-15                            | N24-25                                |
| imidazole only    | 7 <i>i</i> : C13-14,19;<br>N4-5 | 8 <i>i</i> : C60-61,66;<br>N14-15 | 9 <i>i</i> : C107-108,<br>113; N24-25 |
| <i>bpa moiety</i> |                                 |                                   |                                       |
| bridging          | 10: C21-27;                     | 11: C68-74;                       | 12: C115-121;                         |
| benzimidazole     | N6-7                            | N16-17                            | N26-27                                |
| pyridine          | 13: C28-32;<br>N8               | 14: C75-79;<br>N18                | 15: C122-126;<br>N28                  |

**Table S4** Angles and distances between least squares planes.

| Planes         | [Pr <sub>2</sub> (L <sup>AB4</sup> ) <sub>3</sub> ](ClO <sub>4</sub> ) <sub>6</sub> |          | [Nd <sub>2</sub> (L <sup>AB4</sup> ) <sub>3</sub> ](ClO <sub>4</sub> ) <sub>6</sub> |          | [Sm <sub>2</sub> (L <sup>AB4</sup> ) <sub>3</sub> ](ClO <sub>4</sub> ) <sub>6</sub> |          |
|----------------|-------------------------------------------------------------------------------------|----------|-------------------------------------------------------------------------------------|----------|-------------------------------------------------------------------------------------|----------|
|                | Angle                                                                               | <i>d</i> | Angle                                                                               | <i>d</i> | Angle                                                                               | <i>d</i> |
| <i>1 - 6</i>   | 19.4 °                                                                              | 3.474 Å  | 20.3 °                                                                              | 3.492 Å  | 20.8 °                                                                              | 3.479 Å  |
| <i>2 - 4</i>   | 43.4 °                                                                              | 4.247 Å  | 43.0 °                                                                              | 4.269 Å  | 44.0 °                                                                              | 4.231 Å  |
| <i>3 - 5</i>   | 32.6 °                                                                              | 3.969 Å  | 31.7 °                                                                              | 3.953 Å  | 32.0 °                                                                              | 3.887 Å  |
| <i>1i - 9i</i> | 21.2 °                                                                              | 4.290 Å  | 22.6 °                                                                              | 4.295 Å  | 20.3 °                                                                              | 4.291 Å  |
| <i>2i - 7i</i> | 10.9 °                                                                              | 3.510 Å  | 10.9 °                                                                              | 3.505 Å  | 12.9 °                                                                              | 3.489 Å  |
| <i>3i - 8i</i> | 41.1 °                                                                              | 4.141 Å  | 42.1 °                                                                              | 4.123 Å  | 43.0 °                                                                              | 4.087 Å  |
| <i>4 - 9</i>   | 38.5 °                                                                              | 3.909 Å  | 39.0 °                                                                              | 3.905 Å  | 36.8 °                                                                              | 3.785 Å  |
| <i>5 - 7</i>   | 40.4 °                                                                              | 4.169 Å  | 39.5 °                                                                              | 4.172 Å  | 40.9 °                                                                              | 4.145 Å  |
| <i>6 - 8</i>   | 80.1 °                                                                              | 4.962 Å  | 79.8 °                                                                              | 4.939 Å  | 79.5 °                                                                              | 4.896 Å  |
| <i>7 - 12</i>  | 25.7 °                                                                              | 4.191 Å  | 26.1 °                                                                              | 4.225 Å  | 26.6 °                                                                              | 4.240 Å  |
| <i>8 - 10</i>  | 19.3 °                                                                              | 4.204 Å  | 19.9 °                                                                              | 4.259 Å  | 20.2 °                                                                              | 4.277 Å  |
| <i>9 - 11</i>  | 27.9 °                                                                              | 4.416 Å  | 28.7 °                                                                              | 4.449 Å  | 27.2 °                                                                              | 4.476 Å  |
| <i>10 - 15</i> | 27.9 °                                                                              | 3.945 Å  | 29.8 °                                                                              | 3.938 Å  | 28.8 °                                                                              | 3.867 Å  |
| <i>11 - 13</i> | 73.3 °                                                                              | 4.836 Å  | 72.0 °                                                                              | 4.832 Å  | 74.8 °                                                                              | 4.797 Å  |
| <i>12 - 14</i> | 87.9 °                                                                              | 5.182 Å  | 87.7 °                                                                              | 5.202 Å  | 88.3 °                                                                              | 5.159 Å  |

**Table S5** Pitch and Ln<sup>1</sup>-Ln<sup>2</sup> distances in L<sup>AB4</sup> complexes.

|                                                  | Pr <sub>2</sub> | Nd <sub>2</sub> | Sm <sub>2</sub> |
|--------------------------------------------------|-----------------|-----------------|-----------------|
| Pitch (Å)                                        | 13.4(2)         | 13.4(2)         | 13.3(3)         |
| <i>d</i> (Ln <sup>1</sup> -Ln <sup>2</sup> ) (Å) | 9.093(2)        | 9.148(3)        | 9.156(2)        |

**Table S6** Angles (°) and distances (Å) in the coordination polyhedra of L<sup>AB4</sup> complexes.

| benzimidazole-<br>pyridine-<br>carboxamide<br>moiety   | $\Phi$ | $\theta(\text{P1})$<br>$\theta(\text{P3})$   | $\omega(\text{P1-P3})$<br>interstrand<br>intrastrand | $\alpha$<br>P1-P2<br>P1-P3<br>P2-P3 | $\beta$<br>P1<br>P2<br>P3 | Distances                                |                               |
|--------------------------------------------------------|--------|----------------------------------------------|------------------------------------------------------|-------------------------------------|---------------------------|------------------------------------------|-------------------------------|
|                                                        |        |                                              |                                                      |                                     |                           | P1 - P2<br>P2 - P3                       | Ln - P1<br>Ln - P2<br>Ln - P3 |
| Pr <sub>2</sub>                                        | 175.2  | 49(2)                                        | 15(3)                                                | 6.3                                 | 12.2                      | 1.402                                    | 1.605                         |
|                                                        |        | 54(4)                                        | 56(2)                                                | 3.1                                 | 6.1                       | 1.783                                    | 0.210                         |
|                                                        |        |                                              |                                                      | 6.6                                 | 11.6                      |                                          | 1.561                         |
| Nd <sub>2</sub>                                        | 175.7  | 48(1)                                        | 15(3)                                                | 4.7                                 | 11.5                      | 1.434                                    | 1.622                         |
|                                                        |        | 53(4)                                        | 56(2)                                                | 3.9                                 | 6.8                       | 1.790                                    | 0.194                         |
|                                                        |        |                                              |                                                      | 5.3                                 | 10.6                      |                                          | 1.586                         |
| Sm <sub>2</sub>                                        | 175.4  | 47(2)                                        | 14(3)                                                | 5.5                                 | 11.6                      | 1.446                                    | 1.619                         |
|                                                        |        | 53(5)                                        | 56(3)                                                | 3.8                                 | 6.4                       | 1.754                                    | 0.180                         |
|                                                        |        |                                              |                                                      | 6.4                                 | 11.0                      |                                          | 1.560                         |
| Regular trigonal<br>tricapped prism                    | 180    | $\theta(\text{P1}) =$<br>$\theta(\text{P3})$ | 0<br>60                                              | 0<br>0<br>0                         | 0<br>0<br>0               | $d(\text{P1-P2}) =$<br>$d(\text{P2-P3})$ | 0                             |
| benzimidazole-<br>pyridine-<br>benzimidazole<br>moiety | $\Phi$ | $\theta(\text{P4})$<br>$\theta(\text{P6})$   | $\omega(\text{P4-P6})$<br>interstrand<br>intrastrand | $\alpha$<br>P4-P5<br>P4-P6<br>P5-P6 | $\beta$<br>P4<br>P5<br>P6 | Distances                                |                               |
|                                                        |        |                                              |                                                      |                                     |                           | P4 - P5<br>P5 - P6                       | Ln - P4<br>Ln - P5<br>Ln - P6 |
| Pr <sub>2</sub>                                        | 178.2  | 51(3)                                        | 14(2)                                                | 4.4                                 | 4.6                       | 1.655                                    | 1.681                         |
|                                                        |        | 50(2)                                        | 53(2)                                                | 7.5                                 | 8.9                       | 1.738                                    | 0.036                         |
|                                                        |        |                                              |                                                      | 3.5                                 | 11.6                      |                                          | 1.695                         |
| Nd <sub>2</sub>                                        | 178.4  | 51(3)                                        | 13(2)                                                | 4.1                                 | 4.9                       | 1.651                                    | 1.674                         |
|                                                        |        | 51(3)                                        | 53(2)                                                | 7.1                                 | 8.9                       | 1.722                                    | 0.030                         |
|                                                        |        |                                              |                                                      | 3.0                                 | 11.7                      |                                          | 1.686                         |
| Sm <sub>2</sub>                                        | 178.1  | 50(3)                                        | 12(1)                                                | 4.7                                 | 3.5                       | 1.646                                    | 1.658                         |
|                                                        |        | 50(3)                                        | 55(2)                                                | 8.2                                 | 7.9                       | 1.693                                    | 0.022                         |
|                                                        |        |                                              |                                                      | 3.5                                 | 11.4                      |                                          | 1.663                         |
| Regular trigonal<br>tricapped prism                    | 180    | $\theta(\text{P4}) =$<br>$\theta(\text{P6})$ | 0<br>60                                              | 0<br>0<br>0                         | 0<br>0<br>0               | $d(\text{P4-P5}) =$<br>$d(\text{P5-P6})$ | 0                             |

**Table S7 Assignment of  $^1\text{H}$  NMR spectra of homobimetallic  $\text{HHH}[\text{Ln}_2(\text{L}^{\text{ABX}})_3]^{6+}$  complexes in  $\text{CD}_3\text{CN}$ .**

|      | $\text{L}^{\text{AB4}}$ |               |               |               |               |               |               | $\text{L}^{\text{AB5}}$ |               |               |               |               |               |              |               |
|------|-------------------------|---------------|---------------|---------------|---------------|---------------|---------------|-------------------------|---------------|---------------|---------------|---------------|---------------|--------------|---------------|
|      | $\text{La}_2$           | $\text{Ce}_2$ | $\text{Pr}_2$ | $\text{Nd}_2$ | $\text{Sm}_2$ | $\text{Eu}_2$ | $\text{Lu}_2$ | $\text{La}_2$           | $\text{Ce}_2$ | $\text{Pr}_2$ | $\text{Nd}_2$ | $\text{Sm}_2$ | $\text{Eu}_2$ | $\text{Y}_2$ | $\text{Lu}_2$ |
| H1   | 7.67                    | 8.77          | 9.53          | 9.05          | 7.81          | 5.57          | 7.73          | 7.71                    | 8.97          | 9.79          | 9.19          | 7.88          | 5.39          | 7.75         | 7.75          |
| H2   | 8.24                    | 9.76          | 10.56         | 9.58          | 8.42          | 6.57          | 8.23          | 8.28                    | 9.99          | 10.88         | 9.75          | 8.50          | 6.36          | 8.27         | 8.26          |
| H3   | 8.24                    | 10.20         | 11.65         | 10.48         | 8.52          | 4.93          | 8.33          | 8.28                    | 10.61         | 12.25         | 10.82         | 8.65          | 4.53          | 8.36         | 8.37          |
| H4   | 4.46                    | 4.82          | 5.07          | 4.71          | 4.56          | 4.17          | 4.60          | 4.47                    | 4.99          | 5.32          | 4.88          | 4.70          | 4.08          | 4.61         | 4.67          |
| H4'  | 4.64                    | 5.34          | 5.91          | 5.17          | 4.81          | 4.25          | 4.73          | 4.68                    | 5.63          | 6.28          | 5.38          | 4.93          | 3.96          | 4.76         | 4.78          |
| H5   | 1.49                    | 2.46          | 3.05          | 2.18          | 1.67          | 0.71          | 1.51          | 1.51                    | 2.66          | 3.34          | 2.33          | 1.72          | 0.47          | 1.52         | 1.51          |
| H6   | 7.14                    | 7.01          | 7.04          | 7.39          | 7.03          | 6.42          | 7.21          | 7.16                    | 7.20          | 7.30          | 7.57          | 7.12          | 6.24          | 7.22         | 7.25          |
| H7   | 6.80                    | 6.21          | 5.75          | 6.21          | 6.66          | 7.52          | 6.81          | 6.93                    | 6.38          | 5.93          | 6.39          | 6.81          | 7.57          | 6.91         | 6.92          |
| H8   | 6.02                    | -3.16         | -9.95         | -1.91         | 3.94          | 14.17         | 5.52          | 5.97                    | -1.54         | -7.75         | -0.74         | 4.13          | 12.34         | 5.51         | 5.41          |
| H9   | 3.41                    | 2.75          | 2.10          | 2.74          | 3.29          | 4.26          | 3.39          | 3.47                    | 2.85          | 2.33          | 2.83          | 3.39          | 4.36          | 3.49         | 3.49          |
| H9'  | 3.69                    | 2.86          | 2.27          | 2.78          | 3.49          | 4.85          | 3.63          | 3.72                    | 3.17          | 2.57          | 3.01          | 3.60          | 4.51          | 3.67         | 3.66          |
| H10  | 6.12                    | -5.26         | -14.68        | -5.39         | 3.38          | 18.65         | 5.60          | 5.91                    | -1.85         | -8.81         | -2.38         | 4.17          | 13.57         | 5.52         | 5.41          |
| H11  | 7.26                    | 6.97          | 6.68          | 6.95          | 7.19          | 7.65          | 7.21          | 7.38                    | 7.13          | 6.88          | 7.14          | 7.35          | 7.73          | 7.38         | 7.35          |
| H12  | 7.54                    | 8.01          | 8.64          | 8.61          | 7.63          | 5.93          | 7.55          | 7.67                    | 7.88          | 8.39          | 8.58          | 7.72          | 6.33          | 7.71         | 7.70          |
| H13  | 4.26                    | 5.93          | 7.56          | 6.48          | 4.26          | 1.43          | 4.36          | 4.26                    | 4.94          | 6.18          | 5.73          | 4.70          | 3.05          | 4.49         | 4.51          |
| H13' | 3.66                    | 5.59          | 7.56          | 6.04          | 4.68          | 1.02          | 3.96          | 3.94                    | 4.68          | 5.81          | 5.33          | 4.48          | 2.95          | 4.24         | 4.29          |
| H14  | 1.64                    | 2.61          | 3.51          | 2.75          | 1.86          | 0.34          | 1.58          | 1.31                    | 2.02          | 2.86          | 2.38          | 1.55          | 0.54          | 1.44         | 1.44          |
| H15  | 6.22                    | 8.57          | 11.25         | 9.97          | 6.65          | 0.84          | 6.21          | 7.56                    | 8.21          | 9.81          | 9.66          | 7.62          | 4.61          | 7.52         | 7.51          |
| H17  | 6.44                    | 8.63          | 11.12         | 9.97          | 6.80          | 1.14          | 6.33          | 7.54                    | 8.32          | 9.95          | 9.76          | 7.61          | 4.32          | 7.48         | 7.47          |
| H18  | 3.88                    | 6.02          | 7.79          | 6.39          | 4.52          | 1.12          | 4.08          | 4.28                    | 4.94          | 6.12          | 5.35          | 4.31          | 2.95          | 4.35         | 4.37          |
| H18' | 4.38                    | 6.05          | 8.08          | 6.68          | 4.81          | 1.51          | 4.47          | 4.52                    | 5.12          | 6.24          | 5.87          | 4.58          | 3.24          | 4.57         | 4.58          |
| H19  | 1.53                    | 2.27          | 2.93          | 2.37          | 1.70          | 0.64          | 1.52          | 1.49                    | 1.83          | 2.30          | 2.02          | 1.57          | 1.02          | 1.48         | 1.47          |
| H20  | 7.65                    | 8.40          | 9.23          | 8.95          | 7.74          | 5.70          | 7.61          | 7.69                    | 8.02          | 8.61          | 8.70          | 7.72          | 6.15          | 7.72         | 7.70          |
| H21  | 7.29                    | 7.25          | 7.23          | 7.25          | 7.28          | 7.42          | 7.26          | 7.38                    | 7.17          | 7.03          | 7.20          | 7.35          | 7.63          | 7.34         | 7.35          |
| H22  | 6.82                    | 5.93          | 5.07          | 5.87          | 6.58          | 7.97          | 6.76          | 6.88                    | 6.15          | 5.41          | 6.02          | 6.68          | 7.66          | 6.82         | 6.80          |
| H23  | 6.98                    | 0.12          | -6.03         | -0.52         | 5.11          | 15.44         | 6.48          | 6.61                    | 2.60          | -2.24         | 1.32          | 5.47          | 11.46         | 6.31         | 6.19          |
| H24  | 3.35                    | 3.53          | 3.95          | 3.66          | 3.46          | 2.83          | 3.33          | 3.37                    | 3.77          | 4.28          | 3.82          | 3.45          | 2.60          | 3.33         | 3.35          |
| H24' | 3.25                    | 2.86          | 2.81          | 3.17          | 3.22          | 3.24          | 3.33          | 3.27                    | 3.08          | 3.11          | 3.33          | 3.28          | 3.04          | 3.33         | 3.35          |
| H25  | 0.92                    | 1.04          | 1.26          | 1.11          | 0.99          | 0.77          | 1.05          | 0.87                    | 1.20          | 1.51          | 1.23          | 1.01          | 0.57          | 1.02         | 1.06          |
| H26  | 2.81                    | 1.33          | 0.47          | 1.72          | 2.49          | 4.03          | 2.59          | 2.77                    | 1.58          | 0.87          | 1.93          | 2.53          | 3.72          | 2.63         | 2.60          |
| H26' | 2.88                    | 2.33          | 2.05          | 2.44          | 2.64          | 3.26          | 2.72          | 2.84                    | 2.60          | 2.45          | 2.65          | 2.69          | 2.95          | 2.70         | 2.72          |
| H27  | 0.71                    | -2.33         | -4.57         | -1.91         | 0.06          | 3.64          | 0.62          | 0.72                    | -2.15         | -4.31         | -1.75         | 0.10          | 3.49          | 0.64         | 0.63          |
| H28  | 3.51                    | 4.12          | 4.79          | 4.15          | 3.56          | 2.75          | 3.40          |                         |               |               |               |               |               |              |               |
| H28' | 3.42                    | 4.12          | 4.79          | 4.15          | 3.63          | 2.53          | 3.40          |                         |               |               |               |               |               |              |               |
| H29  | 1.18                    | 1.73          | 2.34          | 1.87          | 1.28          | 0.27          | 1.10          |                         |               |               |               |               |               |              |               |

**Table S8 Percentages of HHH isomer in  $[\text{Ln}_2(\text{L}^{\text{ABX}})_3]^{6+}$  complexes in  $\text{CD}_3\text{CN}$  solution at room temperature. Table S3 Percentages of HHH isomer in  $[\text{Ln}_2(\text{L}^{\text{ABX}})_3]^{6+}$  complexes in  $\text{CD}_3\text{CN}$  solution at room temperature.**

| Ln | $\text{L}^{\text{AB1}}$ | $\text{L}^{\text{AB2}}$ | $\text{L}^{\text{AB3}}$ | $\text{L}^{\text{AB4}}$ | $\text{L}^{\text{AB5}}$ |
|----|-------------------------|-------------------------|-------------------------|-------------------------|-------------------------|
| La | 73                      | 20                      | 79                      | 96                      | 60                      |
| Ce | 69                      | 13                      | 79                      | 95                      | 53                      |
| Pr | 67                      | 12                      | 87                      | 93                      | 53                      |
| Nd | 69                      | 15                      | 87                      | 95                      | 55                      |
| Sm | 65                      | 11                      | 85                      | 95                      | 56                      |
| Eu | 69                      | 8                       | 85                      | 96                      | 54                      |
| Y  | 63                      | 8                       | 82                      |                         | 61                      |
| Lu | 68                      | 6                       | 86                      | 94                      | 60                      |

**Table S9** Assignment of  $^1\text{H}$  NMR spectra of heterobimetallic  $\text{HHH}[\text{Ln}^1\text{Ln}^2(\text{L}^{\text{AB4}})_3]^{6+}$  complexes in  $\text{CD}_3\text{CN}$  solution.

|      | LaCe  | LaPr  | LaNd  | LaEu  | LaLu | CeLu  | PrLu   | NdLu  | EuLu  |
|------|-------|-------|-------|-------|------|-------|--------|-------|-------|
| H1   | 9.20  | 10.33 | 9.51  | 5.01  | 7.73 | 7.31  | 6.94   | 7.28  | 8.26  |
| H2   | 10.13 | 11.25 | 9.99  | 6.07  | 8.24 | 7.87  | 7.55   | 7.84  | 8.71  |
| H3   | 10.80 | 12.74 | 11.12 | 4.16  | 8.36 | 7.78  | 7.27   | 7.73  | 9.08  |
| H4   | 5.59  | 6.06  | 5.28  | 3.49  | 4.52 | 3.98  | 3.50   | 3.96  | 5.27  |
| H4'  | 5.80  | 6.90  | 5.77  | 3.49  | 4.72 | 4.16  | 3.66   | 4.12  | 5.45  |
| H5   | 2.60  | 3.75  | 2.58  | 0.15  | 1.46 | 1.09  | 0.76   | 1.07  | 1.96  |
| H6   | 7.46  | 7.94  | 7.88  | 5.68  | 7.05 | 6.54  | 6.08   | 6.53  | 7.83  |
| H7   | 6.47  | 6.31  | 6.52  | 7.05  | 6.72 | 6.39  | 6.08   | 6.36  | 7.23  |
| H8   | -0.15 | -3.95 | 1.45  | 10.61 | 5.64 | 2.72  | 0.16   | 2.47  | 9.22  |
| H9   | 2.87  | 2.54  | 2.99  | 3.91  | 3.38 | 3.19  | 3.01   | 3.11  | 3.79  |
| H9'  | 3.53  | 3.44  | 3.53  | 3.91  | 3.67 | 2.96  | 2.34   | 2.88  | 4.58  |
| H10  | 3.19  | 1.25  | 3.80  | 8.69  | 6.03 | -2.56 | -10.41 | -3.17 | 16.17 |
| H11  | 7.04  | 6.81  | 7.06  | 7.53  | 7.27 | 7.18  | 7.12   | 7.15  | 7.41  |
| H12  | 7.19  | 6.92  | 7.26  | 7.97  | 7.60 | 8.39  | 9.27   | 8.90  | 5.58  |
| H13  | 3.85  | 3.60  | 3.95  | 4.68  | 4.31 | 6.21  | 8.18   | 6.76  | 1.07  |
| H13' | 3.19  | 2.88  | 3.28  | 4.08  | 3.67 | 6.04  | 8.18   | 6.36  | 0.62  |
| H14  | 1.39  | 1.23  | 1.46  | 1.92  | 1.69 | 2.84  | 3.86   | 2.94  | 0.12  |
| H15  | 5.71  | 5.39  | 5.82  | 6.67  | 6.21 | 9.01  | 11.96  | 10.29 | 0.39  |
| H17  | 6.06  | 5.83  | 6.15  | 6.78  | 6.44 | 8.95  | 11.62  | 10.17 | 0.84  |
| H18  | 3.50  | 3.30  | 3.59  | 4.25  | 3.89 | 6.36  | 8.26   | 6.63  | 0.74  |
| H18' | 4.08  | 3.87  | 4.15  | 4.73  | 4.30 | 6.36  | 8.61   | 6.90  | 1.18  |
| H19  | 1.30  | 1.14  | 1.35  | 1.77  | 1.54 | 2.52  | 3.31   | 2.55  | 0.41  |
| H20  | 7.40  | 7.24  | 7.46  | 7.89  | 7.66 | 8.65  | 9.65   | 9.14  | 5.45  |
| H21  | 7.07  | 6.93  | 7.12  | 7.49  | 7.29 | 7.49  | 7.62   | 7.44  | 7.21  |
| H22  | 6.54  | 6.37  | 6.61  | 7.06  | 6.82 | 6.25  | 5.67   | 6.12  | 7.72  |
| H23  | 6.53  | 6.24  | 6.61  | 7.37  | 6.99 | 0.76  | -4.91  | 0.02  | 15.03 |
| H24  | 3.93  | 4.70  | 4.08  | 2.34  | 3.33 | 2.96  | 2.62   | 2.94  | 3.82  |
| H24' | 3.24  | 3.53  | 3.52  | 2.77  | 3.33 | 2.96  | 2.64   | 2.94  | 3.82  |
| H25  | 1.35  | 1.87  | 1.45  | 0.34  | 1.06 | 0.76  | 0.49   | 0.73  | 1.44  |
| H26  | 1.70  | 1.20  | 2.16  | 3.57  | 2.57 | 2.11  | 1.71   | 2.08  | 3.18  |
| H26' | 2.77  | 2.90  | 2.94  | 2.77  | 2.71 | 2.33  | 2.00   | 2.30  | 3.18  |
| H27  | -1.98 | -3.87 | -1.53 | 3.25  | 0.61 | 0.24  | -0.08  | 0.22  | 1.10  |
| H28  | 3.25  | 3.30  | 3.32  | 3.67  | 3.49 | 4.27  | 5.05   | 4.27  | 2.58  |
| H28' | 3.25  | 3.15  | 3.23  | 3.58  | 3.42 | 4.27  | 5.05   | 4.27  | 2.37  |
| H29  | 1.02  | 0.92  | 1.05  | 1.32  | 1.18 | 1.89  | 2.57   | 1.98  | 0.12  |

**Table S10** Assignment of  $^1\text{H}$  NMR spectra of heterobimetallic  $\text{HHH}[\text{Ln}^1\text{Ln}^2(\text{L}^{\text{AB5}})_3]^{6+}$  complexes in  $\text{CD}_3\text{CN}$  solution.

|      | LaCe  | LaPr  | LaNd  | LaEu  | LaLu | CeLu | PrLu  | NdLu  | SmLu | EuLu  |
|------|-------|-------|-------|-------|------|------|-------|-------|------|-------|
| H1   | 9.19  | 10.26 | 9.49  | 5.13  | 7.76 | 7.54 | 7.27  | 7.46  | 7.70 | 8.03  |
| H2   | 10.21 | 11.35 | 10.05 | 6.09  | 8.27 | 8.10 | 7.85  | 8.00  | 8.22 | 8.50  |
| H3   | 11.00 | 13.04 | 11.29 | 4.08  | 8.38 | 8.10 | 7.74  | 8.01  | 8.31 | 8.75  |
| H4   | 5.25  | 5.87  | 5.21  | 3.58  | 4.51 | 4.23 | 3.89  | 4.17  | 4.51 | 4.98  |
| H4'  | 5.94  | 6.89  | 5.76  | 3.58  | 4.76 | 4.47 | 4.12  | 4.38  | 4.70 | 5.16  |
| H5   | 2.90  | 3.80  | 2.61  | 0.17  | 1.47 | 1.27 | 1.04  | 1.22  | 1.44 | 1.75  |
| H6   | 7.42  | 7.83  | 7.85  | 5.74  | 7.06 | 6.79 | 6.45  | 6.74  | 7.09 | 7.60  |
| H7   | 6.53  | 6.31  | 6.60  | 7.24  | 6.84 | 6.62 | 6.35  | 6.57  | 6.83 | 7.21  |
| H8   | -0.33 | -4.31 | 1.30  | 10.44 | 5.55 | 4.02 | 2.25  | 3.58  | 5.15 | 7.34  |
| H9   | 2.92  | 2.57  | 3.03  | 3.97  | 3.45 | 3.31 | 3.14  | 3.21  | 3.46 | 3.87  |
| H9'  | 3.56  | 3.42  | 3.54  | 3.97  | 3.70 | 3.31 | 2.84  | 3.14  | 3.59 | 4.20  |
| H10  | 2.70  | 1.01  | 3.57  | 8.62  | 5.91 | 1.36 | -4.05 | -0.12 | 4.64 | 10.91 |
| H11  | 7.15  | 6.93  | 7.18  | 7.65  | 7.40 | 7.36 | 7.33  | 7.34  | 7.39 | 7.47  |
| H12  | 7.31  | 7.03  | 7.38  | 8.07  | 7.70 | 8.25 | 9.02  | 8.87  | 7.77 | 5.97  |
| H13  | 3.85  | 3.55  | 3.94  | 4.67  | 4.29 | 5.32 | 6.78  | 6.02  | 4.64 | 2.63  |
| H13' | 3.49  | 3.17  | 3.54  | 4.30  | 3.88 | 5.06 | 6.50  | 5.61  | 4.37 | 2.68  |
| H14  | 1.03  | 0.86  | 1.13  | 1.65  | 1.43 | 2.31 | 3.25  | 2.57  | 1.64 | 0.36  |
| H15  | 7.00  | 6.66  | 7.11  | 7.99  | 7.50 | 8.66 | 10.55 | 9.97  | 7.68 | 4.16  |
| H17  | 7.14  | 6.90  | 7.23  | 7.88  | 7.53 | 8.65 | 10.46 | 9.97  | 7.67 | 4.06  |
| H18  | 3.96  | 3.72  | 3.99  | 4.60  | 4.25 | 5.26 | 6.66  | 5.71  | 4.52 | 2.65  |
| H18' | 4.23  | 4.03  | 4.30  | 4.82  | 4.53 | 5.44 | 6.71  | 6.08  | 4.64 | 2.90  |
| H19  | 1.24  | 1.09  | 1.30  | 1.73  | 1.51 | 2.09 | 2.71  | 2.21  | 1.60 | 0.80  |
| H20  | 7.47  | 7.31  | 7.53  | 7.94  | 7.72 | 8.30 | 9.06  | 8.90  | 7.77 | 5.92  |
| H21  | 7.17  | 7.02  | 7.21  | 7.58  | 7.39 | 7.42 | 7.45  | 7.39  | 7.39 | 7.42  |
| H22  | 6.61  | 6.42  | 6.66  | 7.13  | 6.88 | 6.48 | 5.95  | 6.28  | 6.74 | 7.42  |
| H23  | 6.16  | 5.87  | 6.27  | 7.04  | 6.68 | 3.22 | -1.21 | 1.87  | 5.60 | 11.00 |
| H24  | 4.02  | 4.82  | 4.15  | 2.31  | 3.33 | 3.11 | 2.89  | 3.06  | 3.29 | 3.58  |
| H24' | 3.28  | 3.59  | 3.60  | 2.77  | 3.38 | 3.16 | 2.92  | 3.09  | 3.32 | 3.62  |
| H25  | 1.38  | 1.96  | 1.47  | 0.26  | 1.05 | 0.90 | 0.70  | 0.84  | 1.02 | 1.26  |
| H26  | 1.83  | 1.40  | 2.20  | 3.42  | 2.55 | 2.30 | 2.04  | 2.26  | 2.52 | 2.85  |
| H26' | 2.87  | 3.06  | 2.95  | 2.63  | 2.70 | 2.51 | 2.28  | 2.44  | 2.67 | 2.95  |
| H27  | -1.95 | -3.86 | -1.52 | 3.24  | 0.62 | 0.43 | 0.20  | 0.36  | 0.58 | 0.86  |



**Table S11** Composition in % of L<sup>AB4</sup> complexes in solution. For hetero pairs, the first mentioned Ln is in the bpb cavity.

| Ln <sup>1</sup> | Ln <sup>2</sup> | $\Delta r(\text{Ln}^1-\text{Ln}^2)$<br>/ pm | Ln <sup>1</sup> Ln <sup>2</sup> |     | Ln <sup>2</sup> Ln <sup>1</sup> |     | Total hetero | Ln <sup>1</sup> <sub>2</sub> |     | Ln <sup>2</sup> <sub>2</sub> |     |
|-----------------|-----------------|---------------------------------------------|---------------------------------|-----|---------------------------------|-----|--------------|------------------------------|-----|------------------------------|-----|
|                 |                 |                                             | HHH                             | HHT | HHT                             | HHH |              | HHH                          | HHT | HHH                          | HHT |
| La              | Ce              | 2                                           | 34                              |     |                                 | 14  | 48           | 10                           |     |                              | 41  |
| La              | Pr              | 3.7                                         | 41                              |     |                                 | 13  | 54           | 24                           |     |                              | 23  |
| La              | Nd              | 5.3                                         | 54                              |     |                                 | 7   | 61           | 16                           |     |                              | 23  |
| Eu              | Lu              | 8.8                                         | 62                              |     |                                 |     | 62           | 14                           |     |                              | 24  |
| La              | Eu              | 9.6                                         | 75                              |     |                                 |     | 75           | 14                           |     |                              | 12  |
| Nd              | Lu              | 13.1                                        | 68                              |     |                                 |     | 68           | 16                           |     |                              | 16  |
| Pr              | Lu              | 14.7                                        | 82                              |     |                                 |     | 82           | 13                           |     |                              | 5   |
| Ce              | Lu              | 16.4                                        | 76                              |     |                                 |     | 76           | 14                           |     |                              | 11  |
| La              | Lu              | 18.4                                        | 79                              |     |                                 |     | 79           | 11                           |     |                              | 9   |

**Table S12** Composition in % of L<sup>ABS</sup> complexes in solution. For hetero pairs, the first mentioned Ln is in the bpb cavity.

| Ln <sup>1</sup> | Ln <sup>2</sup> | $\Delta r(\text{Ln}^1-\text{Ln}^2)$<br>/ pm | Ln <sup>1</sup> Ln <sup>2</sup> |     | Ln <sup>2</sup> Ln <sup>1</sup> |     | Total hetero | Ln <sup>1</sup> <sub>2</sub> |     | Ln <sup>2</sup> <sub>2</sub> |     |
|-----------------|-----------------|---------------------------------------------|---------------------------------|-----|---------------------------------|-----|--------------|------------------------------|-----|------------------------------|-----|
|                 |                 |                                             | HHH                             | HHT | HHT                             | HHH |              | HHH                          | HHT | HHH                          | HHT |
| La              | Ce              | 2                                           | 24                              | 12  |                                 | 9   | 45           | 15                           | 12  | 16                           | 12  |
| La              | Pr              | 3.7                                         | 29                              | 9   |                                 | 7   | 45           | 17                           | 13  | 13                           | 12  |
| La              | Nd              | 5.3                                         | 39                              | 9   |                                 | 4   | 52           | 14                           | 10  | 13                           | 12  |
| La              | Sm              | 8.4                                         | 47                              | 9   |                                 |     | 56           | 14                           | 11  | 9                            | 10  |
| Eu              | Lu              | 8.8                                         | 39                              | 13  |                                 |     | 52           | 15                           | 11  | 11                           | 11  |
| La              | Eu              | 9.6                                         | 48                              | 9   |                                 |     | 57           | 10                           | 9   | 10                           | 15  |
| Sm              | Lu              | 10                                          | 57                              | 9   |                                 |     | 66           | 10                           | 8   | 7                            | 9   |
| Nd              | Lu              | 13.1                                        | 71                              | 9   |                                 |     | 80           | 6                            | 6   | 5                            | 4   |
| Pr              | Lu              | 14.7                                        | 63                              | 7   |                                 |     | 70           | 9                            | 9   | 8                            | 5   |
| Ce              | Lu              | 16.4                                        | 79                              | 13  |                                 |     | 92           | 4                            | 1   | 2                            | 1   |
| La              | Lu              | 18.4                                        | 77                              | 15  |                                 |     | 92           | 3                            | 1   | 1                            | 1   |

**Table S13** Total percentages of heterobimetallic  $[\text{Ln}^1\text{Ln}^2(\text{L}^{\text{ABX}})_3]^{6+}$  helicates in  $\text{CD}_3\text{CN}$ .

| $\text{Ln}^1\text{Ln}^2$ | $\Delta r(\text{Ln}^1-\text{Ln}^2)$<br>/ pm | $\text{L}^{\text{AB1}}$ | $\text{L}^{\text{AB2}}$ | $\text{L}^{\text{AB3}}$ | $\text{L}^{\text{AB4}}$ | $\text{L}^{\text{AB5}}$ |
|--------------------------|---------------------------------------------|-------------------------|-------------------------|-------------------------|-------------------------|-------------------------|
| LaCe                     | 2                                           | 42                      |                         | 49                      | 48                      | 45                      |
| LaPr                     | 3.7                                         | 41                      |                         | 48                      | 54                      | 45                      |
| LaNd                     | 5.3                                         | 51                      |                         | 57                      | 61                      | 52                      |
| LaSm                     | 8.4                                         |                         |                         |                         |                         | 56                      |
| EuLu                     | 8.8                                         | 73                      | 21                      | 75                      | 62                      | 52                      |
| LaEu                     | 9.6                                         | 64                      |                         | 63                      | 75                      | 57                      |
| SmLu                     | 10                                          | 84                      |                         | 65                      |                         | 66                      |
| NdLu                     | 13.1                                        | 90                      | 27                      | 70                      | 68                      | 80                      |
| PrLu                     | 14.7                                        | 95                      | 51                      | 88                      | 82                      | 70                      |
| CeLu                     | 16.4                                        | 92                      | 60                      | 80                      | 76                      | 92                      |
| LaLu                     | 18.4                                        | 96                      | 65                      | 87                      | 79                      | 92                      |

Chart S1 Numbering of ligating atoms in  $L^{AB4}$ .

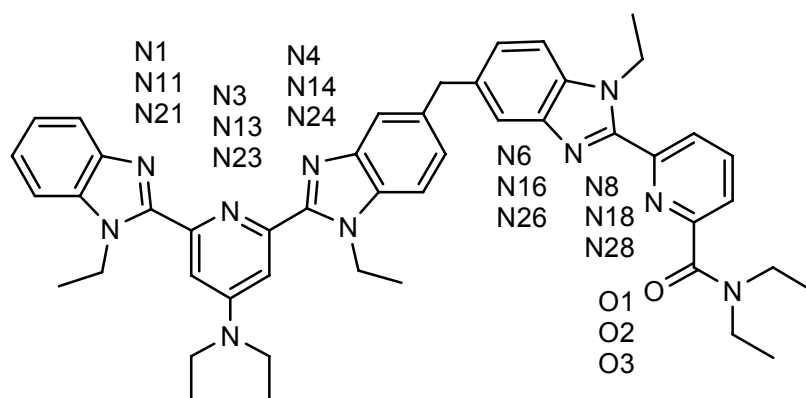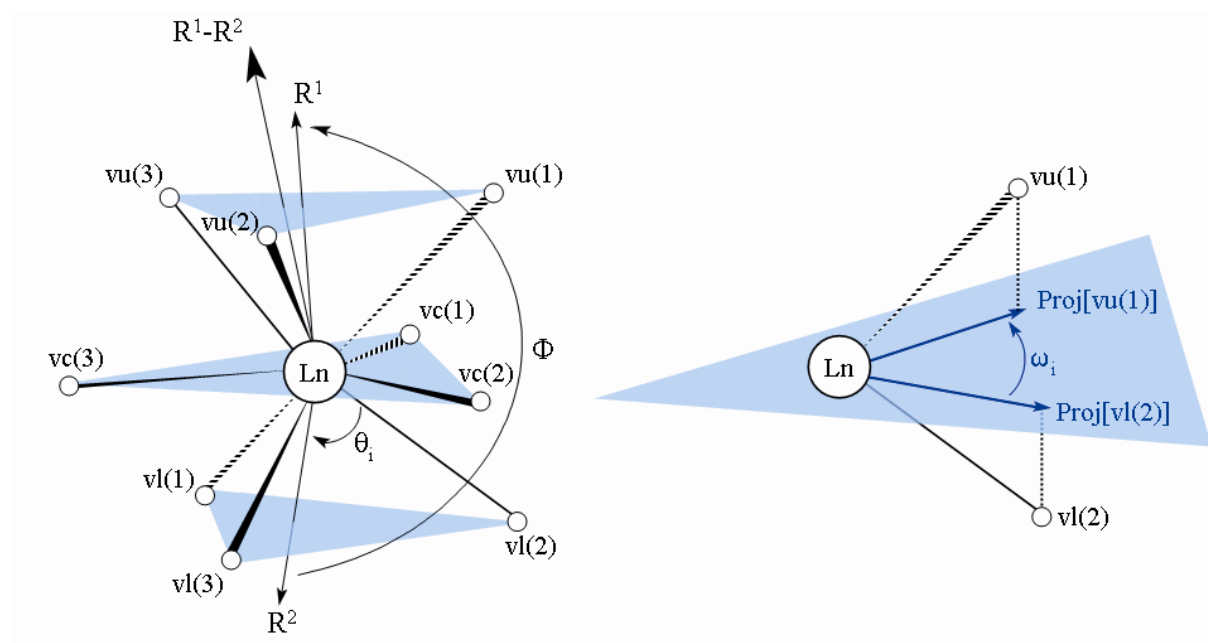

**Figure S1 Definition of angles in the coordination polyhedron.** The vectors  $vu(n)$ ,  $vc(n)$  and  $vl(n)$  are defined by the Ln atom and the coordinating atoms of ligand  $n$  ( $=1, 2$  or  $3$ ) in the upper, capping and lower positions of the tricapped trigonal prism. The angles between them are denoted  $\theta_i$ . The vectors  $R^1$  and  $R^2$  go through the midpoints of the triangles defined by the upper and lower coordinating atoms, respectively.  $\Phi$  is the angle between them. The projection vectors  $\text{Proj}[vm(n)]$  are the projections of vectors  $vm(n)$  onto a plane perpendicular to  $R^1-R^2$ . The angles between these vectors are denoted  $\omega_i$ . Planes in the coordination polyhedra are defined as follows: P1: O1, O2, O3; P2: N8, N18, N28; P3: N6, N16, N26; P4: N4, N14, N24; P5: N3, N13, N23; P6: N1, N11, N21. The angles  $\alpha$  and  $\beta$  are the angles between planes and the angles between a plane and a plane normal to the molecular (Ln-Ln) axis, respectively.
